# Supplementary material for: A High-Throughput Screen Identifies 2,9-Diazaspiro[5.5]Undecanes as Inducers of the Endoplasmic Reticulum Stress Response with Cytotoxic Activity in 3D Glioma Cell Models
Source: PubMed Central journal article supplement (PMC5003374; doi:10.1371/journal.pone.0161486), 2016-08-29
Supplement: pone.0161486.s011.pdf [file pone.0161486.s011.pdf]

**Supporting Table 1.** Performance summary of qHTS assays.

| qHTS Assay                    | Cell Line | Z'          | Intraplate Control                    | AC <sub>50</sub> [μM]                |
|-------------------------------|-----------|-------------|---------------------------------------|--------------------------------------|
| grp78-luciferase<br>primary   | U87-MG    | 0.41 ± 0.21 | Thapsigargin                          | 0.051 ± 0.042                        |
| grp78-luciferase<br>secondary | U87-MG    | 0.36 ± 0.19 | Thapsigargin<br>Tunicamycin           | 0.066 ± 0.13<br>0.014 ± 0.006        |
| UPRE-luciferase               | TSCER2    | 0.68 ± 0.06 | Thapsigargin<br>Tunicamycin<br>17-AAG | NA<br>0.41 ± 0.007<br>7.75 ± 0.38    |
| Caspase 3/7                   | U87-MG    | 0.78 ± 0.21 | Thapsigargin                          | 0.051 ± 0.005                        |
| Cell viability                | U87-MG    | 0.48 ± 0.19 | Thapsigargin<br>Tunicamycin           | 0.020 ± 0.022<br>0.016 ± 0.016       |
|                               | JHH-136   | 0.43 ± 0.15 | Thapsigargin<br>Tunicamycin           | 0.002<br>0.004 ± 0.0017              |
|                               | JHH-520   | 0.51 ± 0.08 | Thapsigargin<br>Tunicamycin           | 0.00025 ± 0.000173<br>0.0041 ± 0.001 |
|                               |           |             |                                       |                                      |
| 3D Cell viability             | U87-MG    | 0.66 ± 0.09 | Thapsigargin<br>Tunicamycin           | < 10<br>< 1.6                        |
|                               | JHH-136   | 0.32 ± 0.03 | Thapsigargin<br>Tunicamycin           | < 10<br>< 1.6                        |
|                               | JHH-520   | 0.61 ± 0.12 | Thapsigargin<br>Tunicamycin           | < 10<br>< 1.6                        |
|                               |           |             |                                       |                                      |
| Calcium mobilization          | U87-MG    | 0.70 ± 0.15 | A23187                                | NA                                   |
| Matrix                        | JHH-136   | 0.64 ± 0.13 | Thapsigargin                          | 0.03 ± 0.02                          |
|                               | JHH-520   | 0.79 ± 0.05 | Thapsigargin                          | 0.0041 ± 0.004                       |
