# Supplementary material for: A High-Throughput Screen Identifies 2,9-Diazaspiro[5.5]Undecanes as Inducers of the Endoplasmic Reticulum Stress Response with Cytotoxic Activity in 3D Glioma Cell Models
Source: PubMed Central journal article supplement (PMC5003374; doi:10.1371/journal.pone.0161486), 2016-08-29
Supplement: pone.0161486.s012.pdf [file pone.0161486.s012.pdf]

**Supporting Table 2.** SAR around the core. Activity in grp78-luciferase assay is shown.

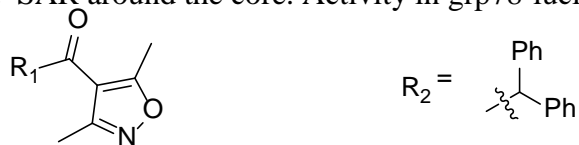

| $R_1$                                                                               | Activity | $R_1$                                                                               | Activity | $R_1$                                                                                 | Activity |
|-------------------------------------------------------------------------------------|----------|-------------------------------------------------------------------------------------|----------|---------------------------------------------------------------------------------------|----------|
| 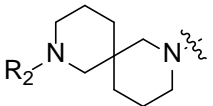   | inactive |    | inactive |    | inactive |
|    | inactive |    | inactive |    | inactive |
|    | inactive |    | inactive |    | inactive |
|    | inactive |    | inactive |    | inactive |
|   | inactive |   | inactive |   | inactive |
|  | inactive |  | inactive |  | inactive |
|  | inactive |  | inactive |  | inactive |
|  | inactive |  | inactive |  | inactive |
|  | inactive |  | inactive |  | inactive |
|  | inactive |  | inactive |  | inactive |
