# Supplementary material for: A High-Throughput Screen Identifies 2,9-Diazaspiro[5.5]Undecanes as Inducers of the Endoplasmic Reticulum Stress Response with Cytotoxic Activity in 3D Glioma Cell Models
Source: PubMed Central journal article supplement (PMC5003374; doi:10.1371/journal.pone.0161486), 2016-08-29
Supplement: pone.0161486.s013.pdf [file pone.0161486.s013.pdf]

**Supporting Table 3.** SAR around the diphenylmethyl region. Activity in grp78-luciferase assay is shown.

| R <sub>1</sub> | Activity | R <sub>1</sub> | Activity |
|----------------|----------|----------------|----------|
| H              | inactive |                | inactive |
| Me             | inactive |                |          |
| Ph             | inactive |                |          |
| Bn             | inactive |                |          |
|                | inactive |                | inactive |
|                | inactive |                |          |
|                | inactive |                |          |
|                | inactive |                | inactive |
|                | inactive |                | inactive |
|                | inactive |                | inactive |
