# Supplementary material for: A High-Throughput Screen Identifies 2,9-Diazaspiro[5.5]Undecanes as Inducers of the Endoplasmic Reticulum Stress Response with Cytotoxic Activity in 3D Glioma Cell Models
Source: PubMed Central journal article supplement (PMC5003374; doi:10.1371/journal.pone.0161486), 2016-08-29
Supplement: pone.0161486.s014.pdf [file pone.0161486.s014.pdf]

**Supporting Table 4.** SAR around the isoxazole region. Activity in grp78-luciferase assay is shown.

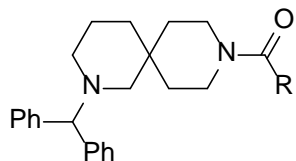

| R | Activity ( $\mu\text{M}$ ) | R | Activity ( $\mu\text{M}$ ) | R | Activity ( $\mu\text{M}$ ) |
|---|----------------------------|---|----------------------------|---|----------------------------|
|   | 20.9                       |   | 2.6                        |   | 3.7                        |
|   | 7.4                        |   | 8.3                        |   | 16.6                       |
|   | 16.6                       |   | 20.9                       |   | 10.5                       |
|   | 29.6                       |   | 26.4                       |   | 23.5                       |
|   | 18.7                       |   | 23.5                       |   | 20.9                       |
|   | 29.6                       |   | 26.4                       |   | 26.4                       |
|   | 29.6                       |   | 18.7                       |   | 11.8                       |
|   | 2.3                        |   | Inactive                   |   | 10.5                       |
|   | 26.4                       |   | 20.9                       |   | 3.3                        |
|   | 33.2                       |   | 5.3                        |   | 33.2                       |
|   | 20.9                       |   | 23.5                       |   | 23.5                       |
|   | 3.0                        |   | 6.6                        |   | 26.4                       |
|   | 14.8                       |   | Inactive                   |   | 23.5                       |
