# Supplementary material for: A High-Throughput Screen Identifies 2,9-Diazaspiro[5.5]Undecanes as Inducers of the Endoplasmic Reticulum Stress Response with Cytotoxic Activity in 3D Glioma Cell Models
Source: PubMed Central journal article supplement (PMC5003374; doi:10.1371/journal.pone.0161486), 2016-08-29
Supplement: pone.0161486.s015.pdf [file pone.0161486.s015.pdf]

**Supporting Table 5.** SAR around the amide region. Activity in grp78-luciferase assay is shown.

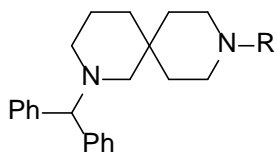

| R                                                                                                                            | Activity |
|------------------------------------------------------------------------------------------------------------------------------|----------|
| <p>Chemical structure: 5-methyl-2-isoxazolone with a sulfonyl group (-SO<sub>2</sub>-) at the 4-position.</p>                | inactive |
| <p>Chemical structure: 5-methyl-2-isoxazolone with an amide group (-NH-C(=O)-) at the 4-position.</p>                        | inactive |
| <p>Chemical structure: 5-methyl-2-isoxazolone with an amide group (-NH-C(=O)-) at the 4-position, different orientation.</p> | inactive |
| <p>Chemical structure: 5-methyl-2-isoxazolone with a 1,2,4-oxadiazole ring at the 4-position.</p>                            | inactive |
| <p>Chemical structure: 5-methyl-2-isoxazolone with a propyl chain at the 4-position.</p>                                     | inactive |
| <p>Chemical structure: 5-methyl-2-isoxazolone with a 1,2,4-oxadiazole ring at the 4-position, different orientation.</p>     | inactive |
